# Supplementary material for: Tuning crystal structure and luminescence of Eu2+-activated LiSr1–xBaxPO4 solid solution for white light-emitting diodes
Source: Royal Society of Chemistry journal article supplement (doi:10.1039/d1ma00950h), 2021-11-24
Supplement: d1ma00950h1.pdf [file d1ma00950h1.pdf]

## Supporting Information

### **Tuning crystal structure and luminescence of Eu<sup>2+</sup>-activated LiSr<sub>1-x</sub>Ba<sub>x</sub>PO<sub>4</sub> solid solution for white light-emitting diodes**

Shuzhen Liao,<sup>a</sup> Yao Zhang,<sup>a</sup> Ying Li,<sup>b</sup> Jilin Zhang<sup>b,\*</sup> Zhen Chen,<sup>a</sup> Bing Yi<sup>a,\*</sup>

<sup>a</sup> Hunan Provincial Key Laboratory of Environmental Catalysis and Waste Recycling, College of Materials and Chemical Engineering, Hunan Institute of Engineering, Xiangtan 411104, China.

<sup>b</sup> Key Laboratory of Light Energy Conversion Materials of Hunan Province College, Hunan Normal University, Changsha 410081, China.

Corresponding Author

\* bingyi2004@126.com (B Yi),

\* chemzhangjl@hunnu.edu.cn (J Zhang).

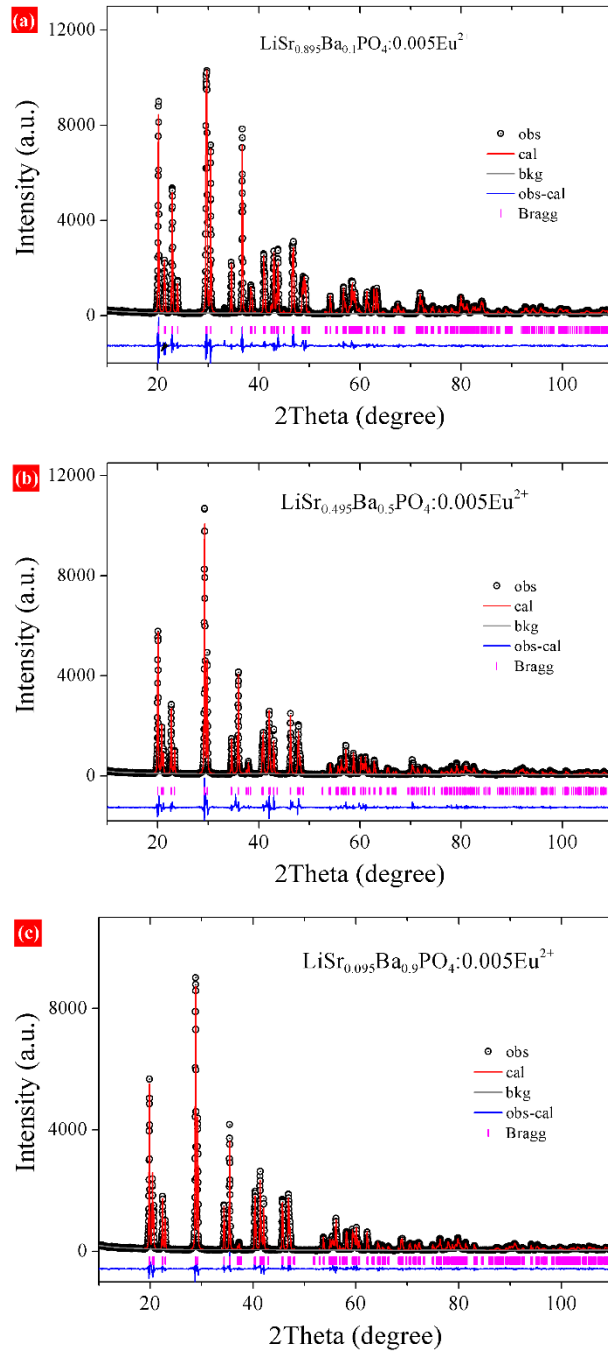

Figure S1. Rietveld refinement of  $\text{LiSr}_{0.995-x}\text{Ba}_x\text{PO}_4:0.005\text{Eu}^{2+}$  synthesized at  $1200^\circ\text{C}$ . (a)  $x = 0.1$ , (b)  $x = 0.5$ , (c)  $x = 0.9$ .

Table S1. Refinement Results and cell parameters for  $\text{LiSr}_{0.995-x}\text{Ba}_x\text{PO}_4:0.005\text{Eu}^{2+}$ 

|                 | $x = 0$<br>(1100 °C) | $x = 0$<br>(1200 °C) | 0.1        | 0.3       | 0.5       | 0.7       | 0.9       | 0.995     |
|-----------------|----------------------|----------------------|------------|-----------|-----------|-----------|-----------|-----------|
| Crystal         |                      |                      | monoclinic |           |           |           |           | trigonal  |
| S. G.*          |                      |                      | C1c1       |           |           |           |           | P31c      |
| $a/\text{Å}$    | 5.1829(1)            | 5.1839(1)            | 5.1886(1)  | 5.1932(1) | 5.1918(1) | 5.2052(1) | 5.2209(1) | 5.1298(1) |
| $b/\text{Å}$    | 8.2776(1)            | 8.2788(2)            | 8.3219(1)  | 8.4411(1) | 8.5644(2) | 8.6319(2) | 8.6895(1) | --        |
| $c/\text{Å}$    | 8.2233(1)            | 8.2212(2)            | 8.2617(1)  | 8.3444(1) | 8.4272(2) | 8.5063(1) | 8.5912(1) | 8.6644(1) |
| $V/\text{Å}^3$  | 352.77(1)            | 352.82(1)            | 356.73(1)  | 365.78(1) | 374.71(1) | 382.20(1) | 389.75(1) | 197.46(1) |
| $\beta^\circ$   | 90.36                | 90.35                | 90.34      | 90.18     | 89.97     | 90.04     | 89.89     | 90        |
| Z               | 4                    | 4                    | 4          | 4         | 4         | 4         | 4         | 2         |
| $R_{\text{wp}}$ | 9.97%                | 15.49%               | 9.60%      | 10.01%    | 13.29%    | 12.63%    | 9.02%     | 12.78%    |
| $R_{\text{p}}$  | 6.26%                | 9.93%                | 6.36%      | 6.85%     | 9.21%     | 8.89%     | 6.23%     | 9.20%     |
| $\chi^2$        | 3.043                | 8.435**              | 2.792      | 2.416     | 3.606     | 2.687     | 1.377     | 2.411     |

\*space group,

\*\*There is an obvious impurity for  $x = 0$  (1200 °C) as indicated in our previous work.<sup>1</sup>

Therefore, a higher  $\chi^2$  value is obtained.

[1] Liao, S.; Li, Y.; Zhang, Y.; Tan, Z.; Fu, X.; Qiu, Z.; Zhang, J., Highly thermal stable phosphor  $\text{LiSrPO}_4:\text{Eu}^{2+}$  with a new crystal structure. *Applied Materials Today* **2020**, *21*, 100792.

Table S2. Atomic parameters of  $\text{LiSr}_{0.995}\text{PO}_4:0.005\text{Eu}^{2+}$ 

| Atom | Wyckoff | S.O.F. | $x/a$    | $y/b$    | $z/c$    | $U_{\text{iso}}/[\text{Å}^2]$ |
|------|---------|--------|----------|----------|----------|-------------------------------|
| Sr   | 4a      | 0.995  | 0.13458  | 0.00771  | -0.15128 | 0.0074                        |
| Eu   | 4a      | 0.005  | 0.13458  | 0.00771  | -0.15128 | 0.0074                        |
| P    | 4a      | 1      | 0.13192  | 0.31069  | 0.57779  | 0.0035                        |
| O1   | 4a      | 1      | -0.16482 | 0.20133  | 0.21813  | 0.0137                        |
| O2   | 4a      | 1      | -0.03622 | 0.15405  | 0.58223  | 0.0101                        |
| O3   | 4a      | 1      | 0.45663  | -0.04824 | 0.60296  | 0.0064                        |
| O4   | 4a      | 1      | -0.25397 | 0.80594  | 0.40881  | 0.0096                        |
| Li   | 4a      | 1      | 0.08191  | 0.38585  | 0.15789  | 0.0137                        |

Table S3. Atomic parameters of  $\text{LiSr}_{0.895}\text{Ba}_{0.1}\text{PO}_4:0.005\text{Eu}^{2+}$ 

| Atom | Wyckoff | S.O.F. | $x/a$    | $y/b$    | $z/c$    | $U_{\text{iso}}/[\text{\AA}^2]$ |
|------|---------|--------|----------|----------|----------|---------------------------------|
| Sr   | 4a      | 0.895  | 0.09480  | 0.00792  | -0.24102 | 0.0121                          |
| Ba   | 4a      | 0.1    | 0.09480  | 0.00792  | -0.24102 | 0.0121                          |
| Eu   | 4a      | 0.005  | 0.09480  | 0.00792  | -0.24102 | 0.0121                          |
| P    | 4a      | 1      | 0.07929  | 0.31176  | 0.49035  | 0.0064                          |
| O1   | 4a      | 1      | -0.20720 | 0.19576  | 0.12438  | 0.0125                          |
| O2   | 4a      | 1      | -0.07595 | 0.15720  | 0.49669  | 0.0099                          |
| O3   | 4a      | 1      | 0.40921  | -0.04505 | 0.51336  | 0.0006                          |
| O4   | 4a      | 1      | -0.29438 | 0.81797  | 0.31876  | 0.0007                          |
| Li   | 4a      | 1      | 0.07424  | 0.37463  | 0.07013  | 0.0051                          |

Table S4. Atomic parameters of  $\text{LiSr}_{0.695}\text{Ba}_{0.3}\text{PO}_4:0.005\text{Eu}^{2+}$ 

| Atom | Wyckoff | S.O.F. | $x/a$    | $y/b$    | $z/c$    | $U_{\text{iso}}/[\text{\AA}^2]$ |
|------|---------|--------|----------|----------|----------|---------------------------------|
| Sr   | 4a      | 0.695  | 0.09237  | -0.00782 | -0.24764 | 0.0150                          |
| Ba   | 4a      | 0.3    | 0.09237  | -0.00782 | -0.24764 | 0.0150                          |
| Eu   | 4a      | 0.005  | 0.09237  | -0.00782 | -0.24764 | 0.0150                          |
| P    | 4a      | 1      | 0.09232  | 0.31989  | 0.53027  | 0.0055                          |
| O1   | 4a      | 1      | -0.32309 | 0.18887  | 0.19764  | 0.0801                          |
| O2   | 4a      | 1      | -0.07909 | 0.16672  | 0.50640  | 0.0121                          |
| O3   | 4a      | 1      | 0.41628  | -0.05247 | 0.50193  | 0.0211                          |
| O4   | 4a      | 1      | -0.16883 | 0.80265  | 0.39912  | 0.0435                          |
| Li   | 4a      | 1      | -0.04435 | 0.38244  | -0.05344 | 0.0231                          |

Table S5. Atomic parameters of  $\text{LiSr}_{0.495}\text{Ba}_{0.5}\text{PO}_4:0.005\text{Eu}^{2+}$ 

| Atom | Wyckoff | S.O.F. | $x/a$    | $y/b$    | $z/c$    | $U_{\text{iso}}/[\text{\AA}^2]$ |
|------|---------|--------|----------|----------|----------|---------------------------------|
| Sr   | 4a      | 0.495  | 0.08980  | -0.00688 | -0.26275 | 0.0153                          |
| Ba   | 4a      | 0.5    | 0.08980  | -0.00688 | -0.26275 | 0.0153                          |
| Eu   | 4a      | 0.005  | 0.08980  | -0.00688 | -0.26275 | 0.0153                          |
| P    | 4a      | 1      | 0.08405  | 0.32096  | 0.51916  | 0.0115                          |
| O1   | 4a      | 1      | -0.32367 | 0.18068  | 0.19251  | 0.0241                          |
| O2   | 4a      | 1      | -0.07443 | 0.17345  | 0.47942  | 0.0057                          |
| O3   | 4a      | 1      | 0.41733  | -0.03951 | 0.50373  | 0.0112                          |
| O4   | 4a      | 1      | -0.17200 | 0.81878  | 0.40850  | 0.0169                          |
| Li   | 4a      | 1      | 0.14386  | 0.36480  | -0.08656 | 0.0192                          |

Table S6. Atomic parameters of  $\text{LiSr}_{0.295}\text{Ba}_{0.7}\text{PO}_4:0.005\text{Eu}^{2+}$ 

| Atom | Wyckoff | S.O.F. | $x/a$    | $y/b$    | $z/c$    | $U_{\text{iso}}/[\text{\AA}^2]$ |
|------|---------|--------|----------|----------|----------|---------------------------------|
| Sr   | 4a      | 0.295  | 0.07613  | -0.00784 | -0.26701 | 0.0127                          |
| Ba   | 4a      | 0.7    | 0.07613  | -0.00784 | -0.26701 | 0.0127                          |
| Eu   | 4a      | 0.005  | 0.07613  | -0.00784 | -0.26701 | 0.0127                          |
| P    | 4a      | 1      | 0.07988  | 0.32443  | 0.51390  | 0.0114                          |
| O1   | 4a      | 1      | -0.34975 | 0.17413  | 0.18824  | 0.0129                          |
| O2   | 4a      | 1      | -0.08824 | 0.17795  | 0.47031  | 0.0035                          |
| O3   | 4a      | 1      | 0.41594  | -0.03907 | 0.48423  | 0.0109                          |
| O4   | 4a      | 1      | -0.18197 | 0.82123  | 0.41150  | 0.0205                          |
| Li   | 4a      | 1      | 0.13918  | 0.35731  | -0.09318 | 0.0039                          |

Table S7. Atomic parameters of  $\text{LiSr}_{0.095}\text{Ba}_{0.9}\text{PO}_4:0.005\text{Eu}^{2+}$ 

| Atom | Wyckoff | S.O.F. | $x/a$    | $y/b$    | $z/c$    | $U_{\text{iso}}/[\text{\AA}^2]$ |
|------|---------|--------|----------|----------|----------|---------------------------------|
| Sr   | 4a      | 0.095  | 0.06931  | -0.00730 | -0.26705 | 0.0110                          |
| Ba   | 4a      | 0.9    | 0.06931  | -0.00730 | -0.26705 | 0.0110                          |
| Eu   | 4a      | 0.005  | 0.06931  | -0.00730 | -0.26705 | 0.0110                          |
| P    | 4a      | 1      | 0.08207  | 0.32917  | 0.52208  | 0.0028                          |
| O1   | 4a      | 1      | -0.37681 | 0.17653  | 0.20869  | 0.0623                          |
| O2   | 4a      | 1      | -0.10093 | 0.17072  | 0.50041  | 0.0269                          |
| O3   | 4a      | 1      | 0.40921  | -0.03654 | 0.47981  | 0.0069                          |
| O4   | 4a      | 1      | -0.18998 | 0.82392  | 0.51741  | 0.0257                          |
| Li   | 4a      | 1      | 0.03941  | 0.35087  | -0.09316 | 0.0569                          |

Table S8. Atomic parameters of  $\text{LiBa}_{0.995}\text{PO}_4:0.005\text{Eu}^{2+}$ 

| Atom | Wyckoff | S.O.F. | $x/a$   | $y/b$   | $z/c$   | $U_{\text{iso}}/[\text{\AA}^2]$ |
|------|---------|--------|---------|---------|---------|---------------------------------|
| Ba   | 2a      | 0.995  | 0       | 0       | 0.02922 | 0.0089                          |
| Eu   | 2a      | 0.005  | 0       | 0       | 0.02922 | 0.0089                          |
| P    | 2b      | 1      | 2/3     | 1/3     | 0.82194 | 0.0027                          |
| O1   | 2b      | 1      | 2/3     | 1/3     | 0.99106 | 0.0415                          |
| O2   | 6c      | 1      | 0.38980 | 0.05364 | 0.76357 | 0.0068                          |
| Li   | 2b      | 1      | 2/3     | 1/3     | 0.18632 | 0.3027                          |

Table S9. Sr/Ba/Eu-O and P-O distances ( $d$ ) of selected samples from the refinement results.

| sample ( $x$ )                                                                                    | Sr/Ba/Eu-O | $d$ (Å) | P-O | $d$ (Å) |
|---------------------------------------------------------------------------------------------------|------------|---------|-----|---------|
| LiSr <sub>0.995</sub> PO <sub>4</sub> :0.005Eu <sup>2+</sup> ,<br>( $x = 0$ )                     | O1         | 2.5566  | O1  | 1.5609  |
|                                                                                                   | O1         | 2.8373  | O2  | 1.5631  |
|                                                                                                   | O2         | 2.6510  | O3  | 1.4949  |
|                                                                                                   | O2         | 2.5067  | O4  | 1.5138  |
|                                                                                                   | O3         | 2.6693  |     |         |
|                                                                                                   | O3         | 2.6881  |     |         |
|                                                                                                   | O4         | 2.5872  |     |         |
|                                                                                                   | O4         | 2.7050  |     |         |
|                                                                                                   | O4         | 3.5570  |     |         |
| LiSr <sub>0.695</sub> Ba <sub>0.3</sub> PO <sub>4</sub> :0.005Eu <sup>2+</sup> ,<br>( $x = 0.3$ ) | O1         | 2.6820  | O1  | 1.4645  |
|                                                                                                   | O1         | 2.7660  | O2  | 1.5820  |
|                                                                                                   | O1         | 3.4304  | O3  | 1.4322  |
|                                                                                                   | O2         | 2.6766  | O4  | 1.6632  |
|                                                                                                   | O2         | 2.6641  |     |         |
|                                                                                                   | O3         | 2.7130  |     |         |
|                                                                                                   | O3         | 2.7209  |     |         |
|                                                                                                   | O4         | 2.5198  |     |         |
|                                                                                                   | O4         | 3.0367  |     |         |
| LiSr <sub>0.295</sub> Ba <sub>0.7</sub> PO <sub>4</sub> :0.005Eu <sup>2+</sup> ,<br>( $x = 0.7$ ) | O1         | 2.6681  | O1  | 1.5273  |
|                                                                                                   | O1         | 2.9311  | O2  | 1.5817  |
|                                                                                                   | O1         | 3.3373  | O3  | 1.4764  |
|                                                                                                   | O2         | 2.8800  | O4  | 1.5158  |
|                                                                                                   | O2         | 2.6392  |     |         |
|                                                                                                   | O3         | 2.7719  |     |         |
|                                                                                                   | O3         | 2.8026  |     |         |
|                                                                                                   | O4         | 3.3476  |     |         |
|                                                                                                   | O4         | 2.5900  |     |         |
| LiBa <sub>0.995</sub> PO <sub>4</sub> :0.005Eu <sup>2+</sup> ,<br>( $x = 0.995$ )                 | O2         | 2.9702  | O1  | 1.4654  |
|                                                                                                   | O2         | 2.9702  | O2  | 1.5145  |
|                                                                                                   | O2         | 2.9702  | O2  | 1.5143  |
|                                                                                                   | O1         | 2.9798  | O2  | 1.5148  |
|                                                                                                   | O1         | 2.9803  |     |         |
|                                                                                                   | O1         | 2.9803  |     |         |
|                                                                                                   | O2         | 2.7653  |     |         |
|                                                                                                   | O2         | 2.7653  |     |         |
|                                                                                                   | O2         | 2.7653  |     |         |

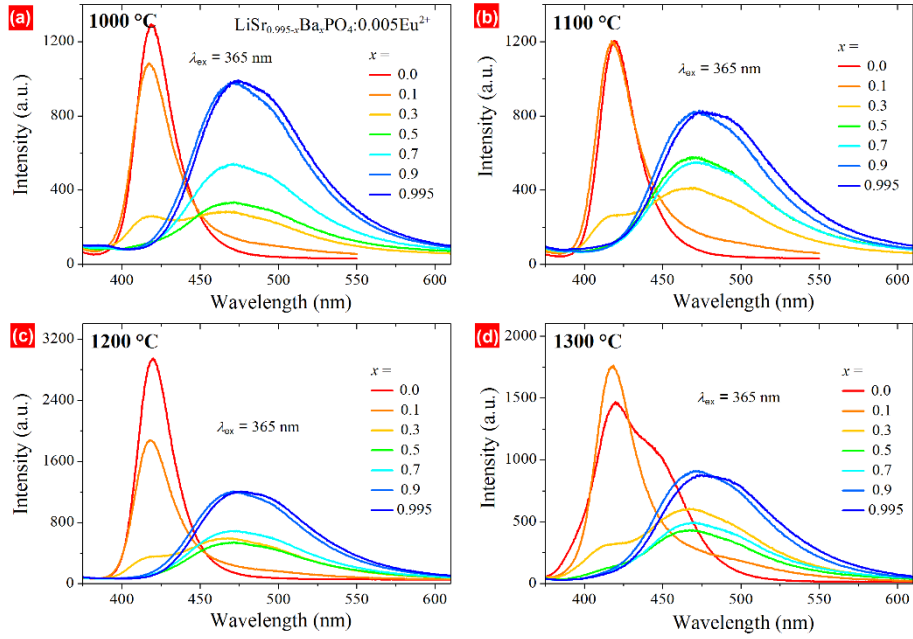

Figure S2. Comparison among PL spectra of  $\text{LiSr}_{0.995-x}\text{Ba}_x\text{PO}_4:0.005\text{Eu}^{2+}$  obtained at (a) 1000, (b) 1100, (c) 1200, and (d) 1300 °C.

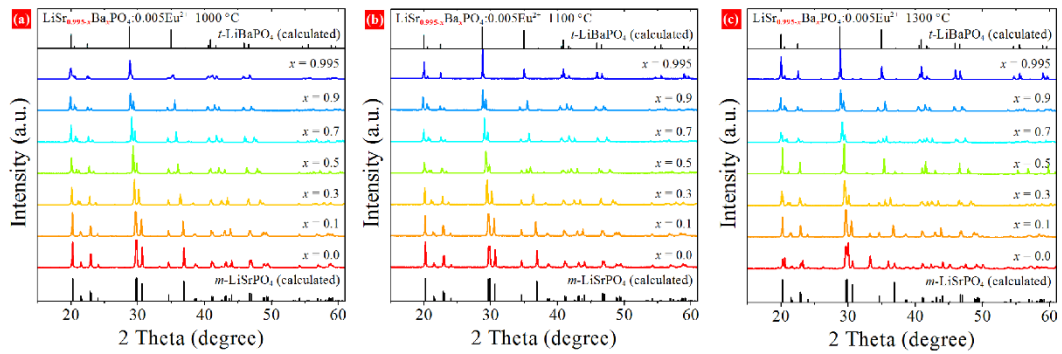

Figure S3. XRD patterns of  $\text{LiSr}_{0.995-x}\text{Ba}_x\text{PO}_4:0.005\text{Eu}^{2+}$  obtained at (a) 1000, (b) 1100, (c) 1300 °C.



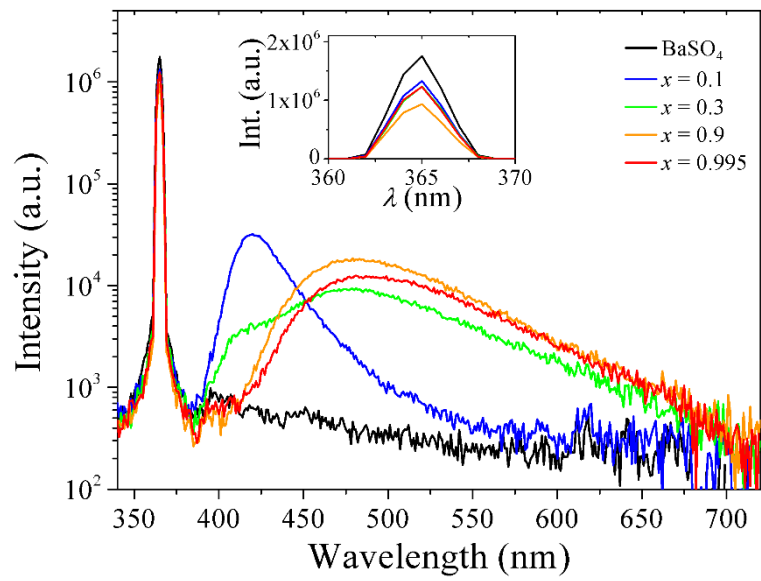

Figure S4. Spectra for the measurement of quantum efficiency.

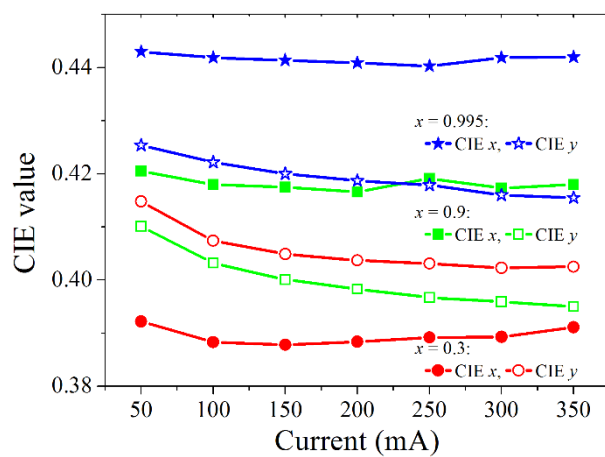

Figure S5. CIE coordinate values versus driving current.
